# Supplementary material
Source: Elsevier journal article supplement (https://www.sciencedirect.com/science/article/pii/S0212656716301950)
Supplement: mmc1 [file S0212656716301950:mmc1.docx]

MATERIAL ADICIONAL PARA LA VERSIÓN ELECTRÓNICA

Anexo 1. Descripción de la variable “grado de cumplimiento” para cada criterio STOPP

| **CRITERIOS STOPP** | |
| --- | --- |
| **Porcentaje sobre total** | **Porcentaje sobre subgrupo** |
| **A.Sistema cardiovascular** | |
| Porcentaje de pacientes con insuficiencia renal o filtrado glomerular <50ml/min tratados con digoxina > 125 mcg/dia, del total de pacientes incluidos | Porcentaje de pacientes tratados con digoxina > 125 mcg/dia, del total de pacientes con insuficiencia renal |
| Porcentaje de pacientes hipertensos que toman diuréticos de asa en monoterapia del total de pacientes incluidos | Porcentaje de pacientes que toman diuréticos de asa en monoterapia del total de pacientes hipertensos |
| Porcentaje de pacientes con antecedentes de gota que toman diuréticos tiacídicos del total de pacientes incluidos | Porcentaje de pacientes que toman diuréticos tiacídicos del total de pacientes con antecedentes de gota |
| Porcentajes de pacientes con EPOCa que toman betabloqueantes no cardioselectivos del total de pacientes incluidos | Porcentaje de pacientes que toman betabloqueantes no cardioselectivos del total de pacientes con EPOC |
| Porcentaje de pacientes que toman Betabloqueantes en combinación con Verapamilo o Diltiazem del total de pacientes incluidos | No procede |
| Porcentaje de pacientes con estreñimiento que toman antagonistas del calcio del total de pacientes incluidos | Porcentaje de pacientes que toman antagonistas del calcio del total de pacientes con estreñimiento |
| Porcentaje de pacientes que toman AASa + Acenocumarol o AAS + Clopidogrel sin antagonistas H2 o IBP del total de pacientes incluidos | Porcentaje de pacientes que toman AASa + Acenocumarol o AAS + Clopidogrel sin antagonistas H2 o IBP del total de pacientes que toman dichas combinaciones |
| Porcentaje de pacientes que toman dipiridamol en monoterapia para prevención secundaria (cardiopatía isquémica, enfermedad cerebrovascular, enfermedad arterial periférica u oclusión arterial) del total de pacientes incluidos | Porcentaje de pacientes que toman dipiridamol en monoterapia del total de pacientes en prevención secundaria (cardiopatía isquémica, enfermedad cerebrovascular, enfermedad arterial periférica u oclusión arterial) |
| Porcentaje de pacientes con antecedentes de úlcera gastroduodenal que toman AAS sin antagonistas H2 o IBP del total de pacientes incluidos | Porcentaje de pacientes que toman AAS sin antagonistas H2 o IBP del total de pacientes con antecedentes de úlcera gastroduodenal |
| Porcentaje de pacientes que toman AAS a dosis > 150 mg/dia  del total de pacientes incluidos | Porcentaje de pacientes que toman AAS a dosis > 150 mg/dia  del total de pacientes que toman AAS |
| Porcentaje de pacientes que toman AAS o clopidogrel sin cardiopatía isquémica, enfermedad cerebrovascular, enfermedad arterial periférica u oclusión arterial,  del total de pacientes incluidos | Porcentaje de pacientes que toman AAS o clopidogrel del total de pacientes sin cardiopatía isquémica, enfermedad cerebrovascular, enfermedad arterial periférica u oclusión arterial |
| Porcentaje de pacientes con trombosis venosa profunda que toman acenocumarol más de 6 meses, del total de pacientes incluidos (excepto si fibrilación auricular o tromboembolismo pulmonar previo ) | Porcentaje de pacientes que toman acenocumarol más de 6 meses, del total de pacientes con trombosis venosa profunda (excepto si fibrilación auricular o tromboembolismo pulmonar previo ) |
| **B.Sistema nervioso central y psicofármacos** | |
| Porcentaje de pacientes con demencia que toman ATCa , del total de pacientes incluidos | Porcentaje de pacientes que toman ATC , del total de pacientes con demencia |
| Porcentaje de pacientes con glaucoma que toman ATC , del total de pacientes incluidos | Porcentaje de pacientes que toman ATC , del total de pacientes con glaucoma |
| Porcentaje de pacientes con trastornos del ritmo cardíaco que toman ATC , del total de pacientes incluidos | Porcentaje de pacientes que toman ATC , del total de pacientes con trastornos del ritmo cardíaco |
| Porcentaje de pacientes con estreñimiento que toman ATC , del total de pacientes incluidos | Porcentaje de pacientes que toman ATC , del total de pacientes con estreñimiento |
| Porcentaje de pacientes que toman ATC con opiáceos o antagonistas del calcio del total de pacientes incluidos | Porcentaje de pacientes que toman ATC del total de pacientes con opiáceos o antagonistas del calcio |
| Porcentaje de pacientes con prostatismo o retención urinaria que toman ATC , del total de pacientes incluidos | Porcentaje de pacientes que toman ATC , del total de pacientes con prostatismo o retención urinaria |
| Porcentaje de pacientes que toman benzodiacepinas de vida media larga más de 1 mes, del total de pacientes incluidos | Porcentaje de pacientes que toman benzodiacepinas de vida media larga más de 1 mes del total de pacientes que toman BZD de vida media larga |
| Porcentaje de pacientes con parkinsonismo que toman neurolépticos  más de 1 mes, del total de pacientes incluidos | Porcentaje de pacientes que toman neurolépticos  más de 1 mes, del total de pacientes con parkinsonismo |
| Porcentaje de pacientes con epilepsia que toman fenotiazinas , del total de pacientes incluidos | Porcentaje de pacientes que toman fenotiazinas , del total de pacientes con epilepsia |
| Porcentaje de pacientes que toman anticolinérgicos para los efectos secundarios de los neurolépticos, del total de pacientes incluidos | Porcentaje de pacientes que toman anticolinérgicos para los efectos secundarios de los neurolépticos, del total de pacientes que toman neurolépticos |
| Porcentaje de pacientes con antecedentes de hiponatremia <130 que toman ISRS, del total de pacientes incluidos | Porcentaje de pacientes con antecedentes de hiponatremia <130, del total de pacientes que toman ISRS |
| Porcentaje de pacientes que toman antihistamínicos de primera generación más de 1 semana, del total de pacientes incluidos | No procede |
| **C.Sistema gastrointestinal** | |
| Porcentaje de pacientes con parkinsonismo que toman metoclopramida, del total de pacientes incluidos | Porcentaje de pacientes que toman metoclopramida, del total de pacientes con parkinsonismo |
| Porcentaje de pacientes con enfermedad ulcerosa péptica que toman IBPa  más de 8 semanas, del total de pacientes incluidos (excepto si antiagregación con AAS) | Porcentaje de pacientes que toman IBP más de 8 semanas, del total de pacientes con enfermedad ulcerosa péptica (excepto si antiagregación con AAS) |
| Porcentaje de pacientes con estreñimiento que toman anticolinérgicos, del total de pacientes incluidos | Porcentaje de pacientes que toman anticolinérgicos , del total de pacientes con estreñimiento |
| **D.Sistema respiratorio** | |
| Porcentaje de pacientes con EPOC que toman teofilina en monoterapia, del total de pacientes incluidos | Porcentaje de pacientes que toman teofilina en monoterapia, del total de pacientes con EPOC |
| **E.Sistema musculoesquelético** | |
| Porcentaje de pacientes con antecedentes de enfermedad ulcerosa péptica o hemorragia digestiva alta que toman AINEa, del total de pacientes incluidos, excepto si uso concomitante de antagonistasH2, IBP o misoprostol | Porcentaje de pacientes que toman de AINE del total de pacientes con antecedentes de enfermedad ulcerosa péptica o hemorragia digestiva alta, excepto si uso concomitante de antagonistasH2, IBP o misoprostol, |
| Porcentaje de pacientes con hipertensión moderada o severa que toman AINE, del total de pacientes incluidos (excepto si enfermedad reumática) | Porcentaje de pacientes que toman AINE del total de pacientes con hipertensión moderada o severa (excepto si enfermedad reumática) |
| Porcentaje de pacientes con insuficiencia cardíaca que toman AINE, del total de pacientes incluidos | Porcentaje de pacientes que toman AINE del total de pacientes con insuficiencia cardíaca |
| Porcentaje de pacientes con artrosis con uso prolongado de AINE, del total de pacientes incluidos | Porcentaje de pacientes con uso prolongado de AINE, del total de pacientes con artrosis |
| Porcentaje de pacientes que toman acenocumarol y AINE simultáneamente, del total de pacientes incluidos | No procede |
| Porcentaje de pacientes con insuficiencia renal crónica o filtrado glomerular < 50ml/min que toman AINE, del total de pacientes incluidos | Porcentaje de pacientes que toman AINE del total de pacientes con insuficiencia renal crónica o filtrado glomerular < 50ml/min |
| **F.Sistema urogenital** | |
| Porcentaje de pacientes con demencia que toman antimuscarínicos vesicales, del total de pacientes incluidos | Porcentaje de pacientes que toman antimuscarínicos vesicales, del total de pacientes con demencia |
| Porcentaje de pacientes con glaucoma crónico que toman antimuscarínicos vesicales, del total de pacientes incluidos | Porcentaje de pacientes que toman antimuscarínicos vesicales, del total de pacientes con glaucoma crónico |
| Porcentaje de pacientes con estreñimiento que toman antimuscarínicos vesicales, del total de pacientes incluidos | Porcentaje de pacientes que toman antimuscarínicos vesicales, del total de pacientes con estreñimiento |
| Porcentaje de pacientes con prostatismo crónico que toman antimuscarínicos vesicales, del total de pacientes incluidos | Porcentaje de pacientes que toman antimuscarínicos vesicales, del total de pacientes con prostatismo crónico |
| Porcentaje de hombres con incontinencia de orina que toman bloqueadores alfa, del total de hombres incluidos | Porcentaje de hombres que toman bloqueadores alfa, del total de hombres con incontinencia de orina |
| **G.Sistema endocrino** | |
| Porcentaje de pacientes con diabetes mellitus tipo 2 que toman glibenclamida o clorpropamida, del total de pacientes incluidos | Porcentaje de pacientes que toman glibenclamida o clorpropamida, del total de pacientes con diabetes mellitus tipo 2 |
| Porcentaje de pacientes con antecedentes de cáncer de mama o trombosis venosa profunda que toman estrógenos, del total de pacientes incluidos | Porcentaje de pacientes que toman estrógenos, del total de pacientes con antecedentes de cáncer de mama o trombosis venosa profunda |
| **I.Analgésicos** | |
| Porcentaje de pacientes con estreñimiento crónico sin laxantes que toman opiáceos más de 2 semanas, del total de pacientes incluidos | Porcentaje de pacientes que toman opiáceos más de 2 semanas, del total de pacientes con estreñimiento crónico sin laxantes |
| **J. Clase de medicamento duplicada** | |
| Porcentaje de pacientes que toman medicamentos duplicados: 2 opiáceos, AINE, ISRSa; diuréticos de asa, inhibidores de la enzima conversora de la angiotensina, del total de pacientes incluidos | No procede |

a: EPOC: enfermedad pulmonar obstructiva crónica; AAS: ácido acetilsalicílico; ATC: antidepresivos tricíclicos; IBP: inhibidores de la bomba de protones; AINE: antiinflamatorios no esteroideos; ISRS: inhibidores selectivos de la recaptación de serotonina.

Anexo 2. Descripción de la variable “grado de cumplimiento” para cada criterio START

| **CRITERIOS START: Descripción de los indicadores** | |
| --- | --- |
| **Porcentaje sobre total** | **Porcentaje sobre subgrupo** |
| 1. **Sistema cardiovascular** | | |
| Porcentaje de pacientes con fibrilación auricular crónica que toman acenocumarol o AASa o inhibidores de la trombina, del total de pacientes incluidos | Porcentaje de pacientes que toman acenocumarol o AASo inhibidores de la trombina, del total de pacientes con fibrilación auricular crónica |
| Porcentaje de pacientes con antecedentes de enfermedad aterosclerótica coronaria, cerebral o arterial periférica, en en ritmo sinusa,l, que toman AAS o clopidogrel, del total de pacientes incluidos | Porcentaje de pacientes que toman AAS o clopidogrel, del total de pacientes con antecedentes de enfermedad aterosclerótica coronaria, cerebral o arterial periférica, en ritmo sinusal |
| Porcentaje de pacientes con presión arterial sistólica normalmente superior a 160 mmHg que toman tratamiento antihipertensivo, del total de pacientes incluidos | Porcentaje de pacientes que toman tratamiento antihipertensivo, del total de pacientes con presión arterial sistólica normalmente superior a 160 mmHg |
| Porcentaje de pacientes con insuficiencia cardíaca que toman IECAa o ARA 2a, del total de pacientes incluidos | Porcentaje de pacientes que toman IECA o ARA 2, del total de pacientes con insuficiencia cardíaca |
| Porcentaje de pacientes que tras un infarto toman IECAa o ARA 2a, del total de pacientes incluidos | Porcentaje de pacientes que toman IECAa o ARA 2a, del total de pacientes tras un infarto |
| Porcentaje de pacientes con angina que toman bloqueantes beta, del total de pacientes incluidos | Porcentaje de pacientes que toman bloqueantes beta, del total de pacientes con angina |
| **E. Sistema musculoesquelético** | |
| Porcentaje de pacientes con corticoides orales a dosis de mantenimiento que toman bifosfonatos, del total de pacientes incluidos | Porcentaje de pacientes que toman bifosfonatos del total de pacientes con corticoides orales a dosis de mantenimiento |
| Porcentaje de pacientes con osteoporosis conocida que toman suplementos de calcio y vitamina D, del total de pacientes incluidos | Porcentaje de pacientes que toman suplementos de calcio y vitamina D, del total de pacientes con osteoporosis conocida |
| **F.Sistema endocrino** | |
| Porcentajes de pacientes con DM2a en ausencia de insuficiencia renal, que toman metformina, del total de pacientes incluidos | Porcentajes de que toman metformina, del total de pacientes con DM2 en ausencia de insuficiencia renal, |
| Porcentaje de pacientes con DM2 con nefropatía que toman IECA o ARA2, del total de pacientes incluidos | Porcentaje de pacientes que toman IECA o ARA2, del total de pacientes con DM2 con nefropatía |
| Porcentaje de pacientes con uno o más FRCVa que toman antiagregantes plaquetarios, del total de pacientes incluidos | Porcentaje de pacientes que toman antiagregantes plaquetarios, del total de pacientes con uno o más FRCV |
| Porcentaje de pacientes con DM2 y uno o más FRCV que toman estatinas, del total de pacientes incluidos | Porcentaje de pacientes que toman estatinas, del total de pacientes con DM2 y uno o más FRCV |

a: AAS: ácido acetilsalicílico; IECA: inhibidores del enzima conversor de la angiotensina; ARA2: antagonistas de los receptores de la angiotensina 2; DM2: diabetes mellitus tipo 2; FRCV: factores de riesgo cardiovascular
